# Supplementary material
Source: PubMed Central journal article supplement (PMC4493536)
Supplement: thnov05p0985s1.pdf [file thnov05p0985s1.pdf]

## Supporting Information for

# **DNA Aptamer Selected against Pancreatic Ductal Adenocarcinoma for in vivo Imaging and Clinical Tissue Recognition**

Xiaoqiu Wu<sup>1\*</sup>, Zilong Zhao<sup>1\*</sup>, Huarong Bai<sup>1</sup>, Chao Yang<sup>1,2</sup>, Xiaoxiao Hu<sup>1</sup>, Qiaoling Liu<sup>1</sup>, Ting Fu<sup>1,3</sup>, Mao Ye<sup>1</sup> , and Weihong Tan<sup>1,3</sup> 

1. Molecular Science and Biomedicine Laboratory, State Key Laboratory for Chemo/Bio Sensing and Chemometrics, College of Biology, College of Chemistry and Chemical Engineering and Collaborative Research Center of Molecular Engineering for Theranostics, Hunan University, Changsha 410082, China

2. College of Life and Environmental Science, National Navel Orange Engineering Research Center, Gannan Normal University, Economic & Technological Development Zone, Ganzhou 341000, China

3. Departments of Chemistry, Department of Physiology and Functional Genomics, Center for Research at Bio/Nano Interface, Shands Cancer Center, University of Florida Genetics Institute and McKnight Brain Institute, University of Florida, Gainesville, FL 32611-7200, USA

\* Xiaoqiu Wu and Zilong Zhao contributed equally.

✉ Corresponding authors: Prof. Weihong Tan, E-mail: [tan@chem.ufl.edu](mailto:tan@chem.ufl.edu); Prof. Mao Ye, E-mail: [yemaocsu@hotmail.com](mailto:yemaocsu@hotmail.com)

**Table S1.** Truncation of aptamer XQ-2

| Name  | Sequences (5' → 3')                                                                 | Length (nt) |
|-------|-------------------------------------------------------------------------------------|-------------|
| XQ-2  | ACCGACCGTGCTGGACTCATAGGGTTAGGGGCTGCTGGCCAGAT<br>ACTCAGATGGTAGGGTACTATGAGCGAGCCTGGCG | 1 - 80      |
| XQ-2a | GCTGGACTCATAGGGTTAGGGGCTGCTGGCCAGATACTCAGATG<br>GTAGGGTACTATGAGCGAGC                | 10 - 74     |
| XQ-2b | ACCGACCGTGCTGGACTCATAGGGTTAGGGGCTGCTGGCCAGAT<br>ACTCAGATGGTAGGGTACTA                | 1 - 65      |
| XQ-2c | TAGGGTTAGGGGCTGCTGGCCAGATACTCAGATGGTAGGGTACT<br>ATGAGCGAGCCTGGCG                    | 20 - 80     |
| XQ-2d | ACTCATAGGGTTAGGGGCTGCTGGCCAGATACTCAGATG<br>GTAGGGTACTATGAGC                         | 15 - 70     |
| XQ-2e | TAGGGTTAGGGGCTGCTGGCCAGATACTCAGATGGTAGGGTACT<br>AT                                  | 20 - 66     |
| XQ-2f | TAGGGTTAGGGGCTGCTGGCCAGATACTCAGATGGTAGGGTT                                          | 20 - 61     |

**Table S2.** Mutation of XQ-2d

| Name                                                   | Sequences (5' → 3')                                                          |
|--------------------------------------------------------|------------------------------------------------------------------------------|
| XQ-2d                                                  | ACTCATAGGGTTAGGGGCTGCTGGCCAGATACTC<br>AGATG GTAGGGTACTATGAGC                 |
| XQ-2d with stem replaced<br>with random bases          | NNNNNNNNGGTTAGGGGCTGCTGGCCAGATACTC<br>AGATGGTAGGGTTANNNNNNNN                 |
| XQ-2d with with stem<br>replaced with other base pairs | <u>ATAGTCT</u> GGGTTAGGGGCTGCTGGCCAGATACTC<br>AGATGGTAGGGTTAC <u>AGACTAC</u> |
| XQ-2d with loop replaced<br>with random bases          | ACTCATANNNNNNNNNNNNNNNNNNNNNNNNNNNNNNN<br>NNNNNNNNNNNNNNNNNTATGAGC           |

**Table S3.** Aptamer XQ-2d with artificial bases

| Name                       | Sequences (5' → 3')                                                                                                      |
|----------------------------|--------------------------------------------------------------------------------------------------------------------------|
| XQ-2d                      | ACTCATAGGGTTAGGGGCTGCTGGCCAGATACTC<br>AGATG GTAGGGTACTATGAGC                                                             |
| Phosphorodithiate XQ-2d    | A*C*T*C*ATAGGGTTAGGGGCTGCTGGCCAGATA<br>CTCAGATGGTAGGGTACTAT*G*A*G*C                                                      |
| 2'-O-methyl-modified XQ-2d | /i2OMeA//i2OMeC//i2OMeU//i2OMeC/ATAGGGTTAG<br>GGGCTGCTGGCCAGATACTCAGATGGTAGGGTTA<br>CTAT/i2OMeG//i2OMeA//i2OMeG//i2OMeC/ |

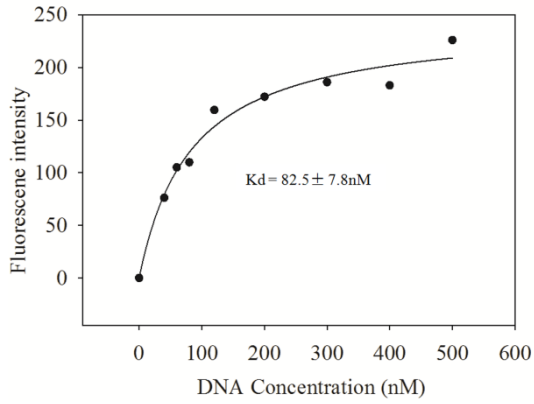

**Figure S1.** Dissociation constant of truncated XQ-2 for target PL45 cells.

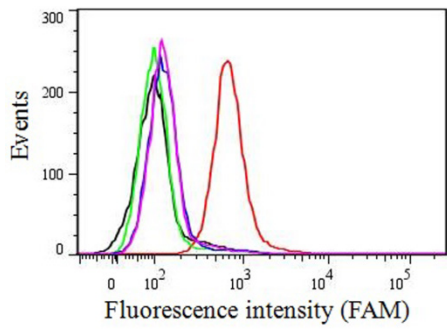

**Figure S2.** Binding ability of mutated aptamers to PL45 cells. Black line: library, red line: XQ-2d, green line: XQ-2d with stem bases replaced by random bases, blue line: XQ-2d with stem bases replaced with other base pairs, purple line: XQ-2d with loop replaced with random bases.

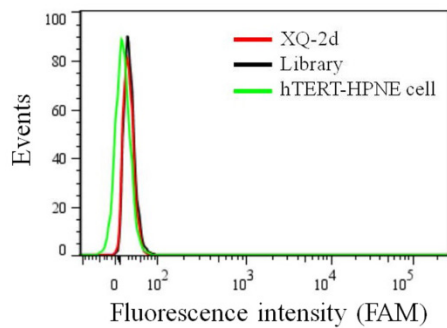

**Figure S3.** Binding ability of XQ-2d to hTERT-HPNE cells.

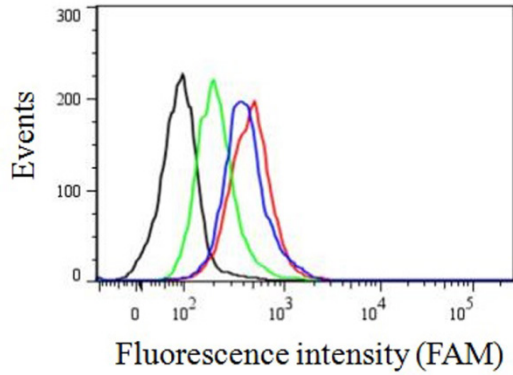

**Figure S4.** Binding ability of aptamer with chemical modifications to PL45 cells. Black line: library, red line: XQ-2d, green line: XQ-2d synthesized with phosphorodithiate oligonucleotides, blue line: XQ-2d synthesized with 2'-O-methyl oligonucleotides.

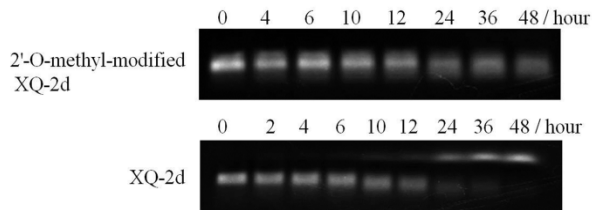

**Figure S5.** The stability of XQ-2d and 2'-O-methyl-modified XQ-2d in cell medium with 10% FBS.

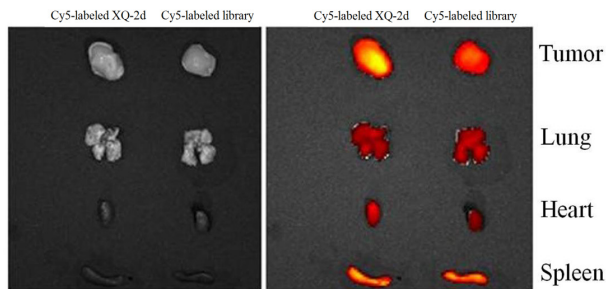

**Figure S6.** Optical and fluorescent images of organ tissues isolated from PDAC-grafted mice injected with Cy5-labeled XQ-2d and Cy5-labeled library.

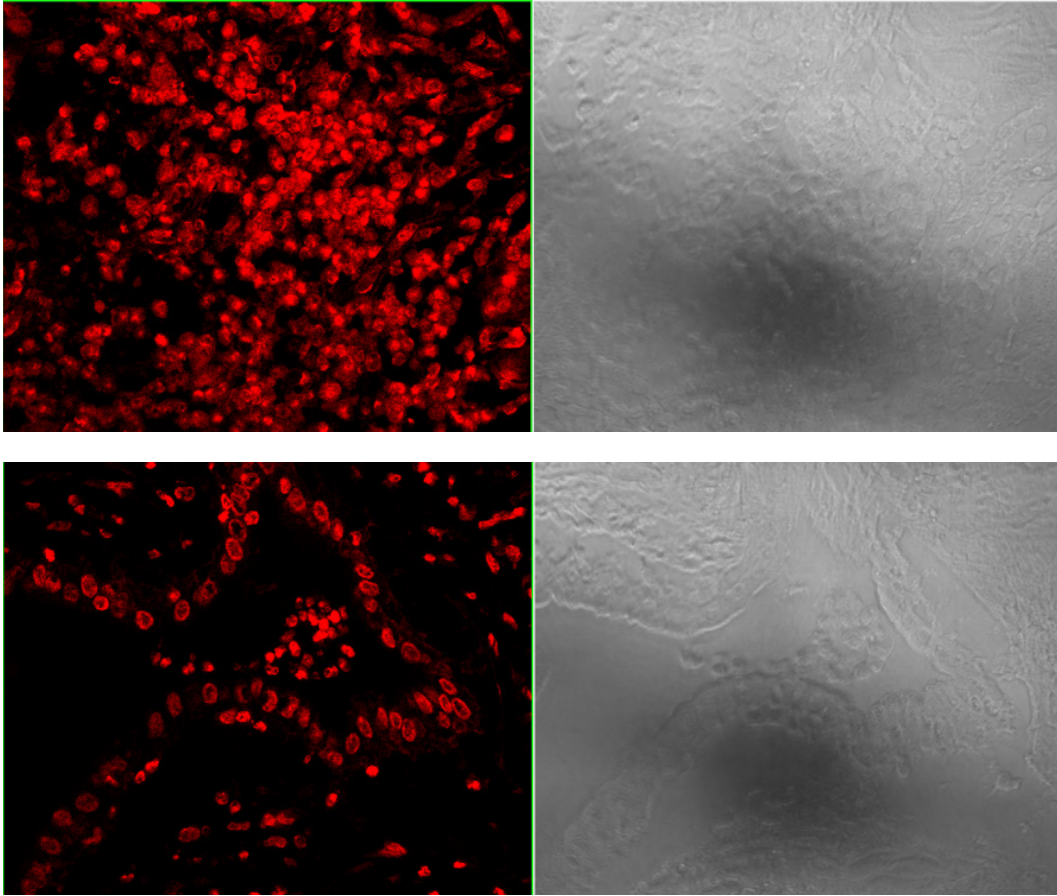

**Figure S7.** Representative images of clinical PDAC tissues stained with Cy5-labeled XQ-2 aptamer.
